# Supplementary material for: Activation of IRF1 in Human Adipocytes Leads to Phenotypes Associated with Metabolic Disease
Source: PubMed Central journal article supplement — Stem Cell Reports. 2017 Apr 13;8(5):1164–73. doi: 10.1016/j.stemcr.2017.03.014 (PMC5425619; doi:10.1016/j.stemcr.2017.03.014), 2017-04-13
Supplement: mmc1.pdf [file mmc1.pdf]

**Stem Cell Reports, Volume 8**

**Supplemental Information**

**Activation of IRF1 in Human Adipocytes Leads to Phenotypes Associated with Metabolic Disease**

**Max Friesen, Raymond Camahort, Youn-Kyoung Lee, Fang Xia, Robert E. Gerszten, Eugene P. Rhee, Rahul C. Deo, and Chad A. Cowan**

# Figure S1, Adipocyte identity validation. Related to Figure 1.

A.

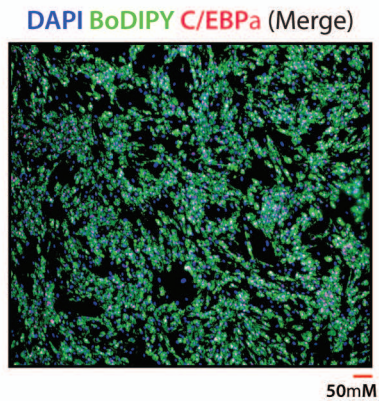

Image J Mask

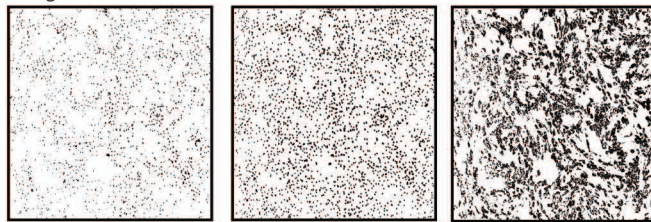

~100% BoDIPY positive cells express C/EBPa

90% (1732/1914) DAPI Positive cells express C/EBPa

B.

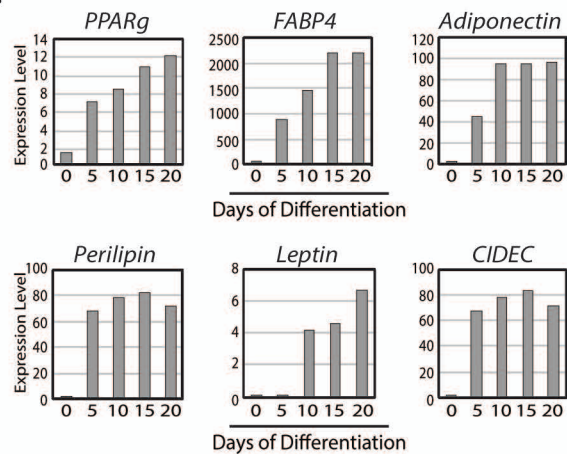

C.

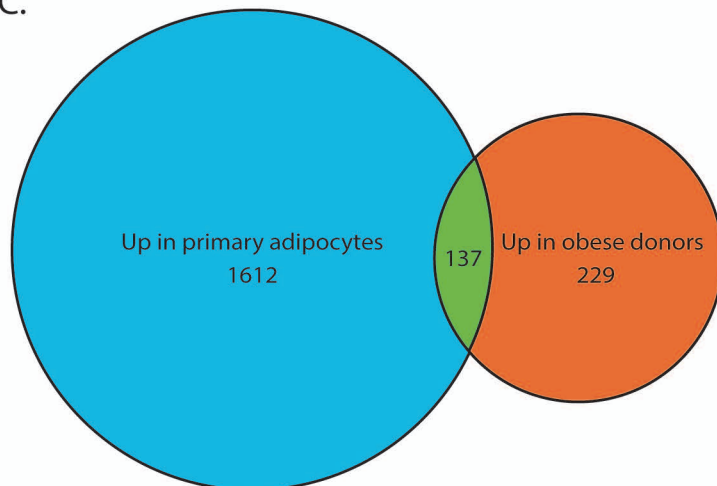

# Figure S2, IRF1 overexpression. Related to Figure 2 & 3.

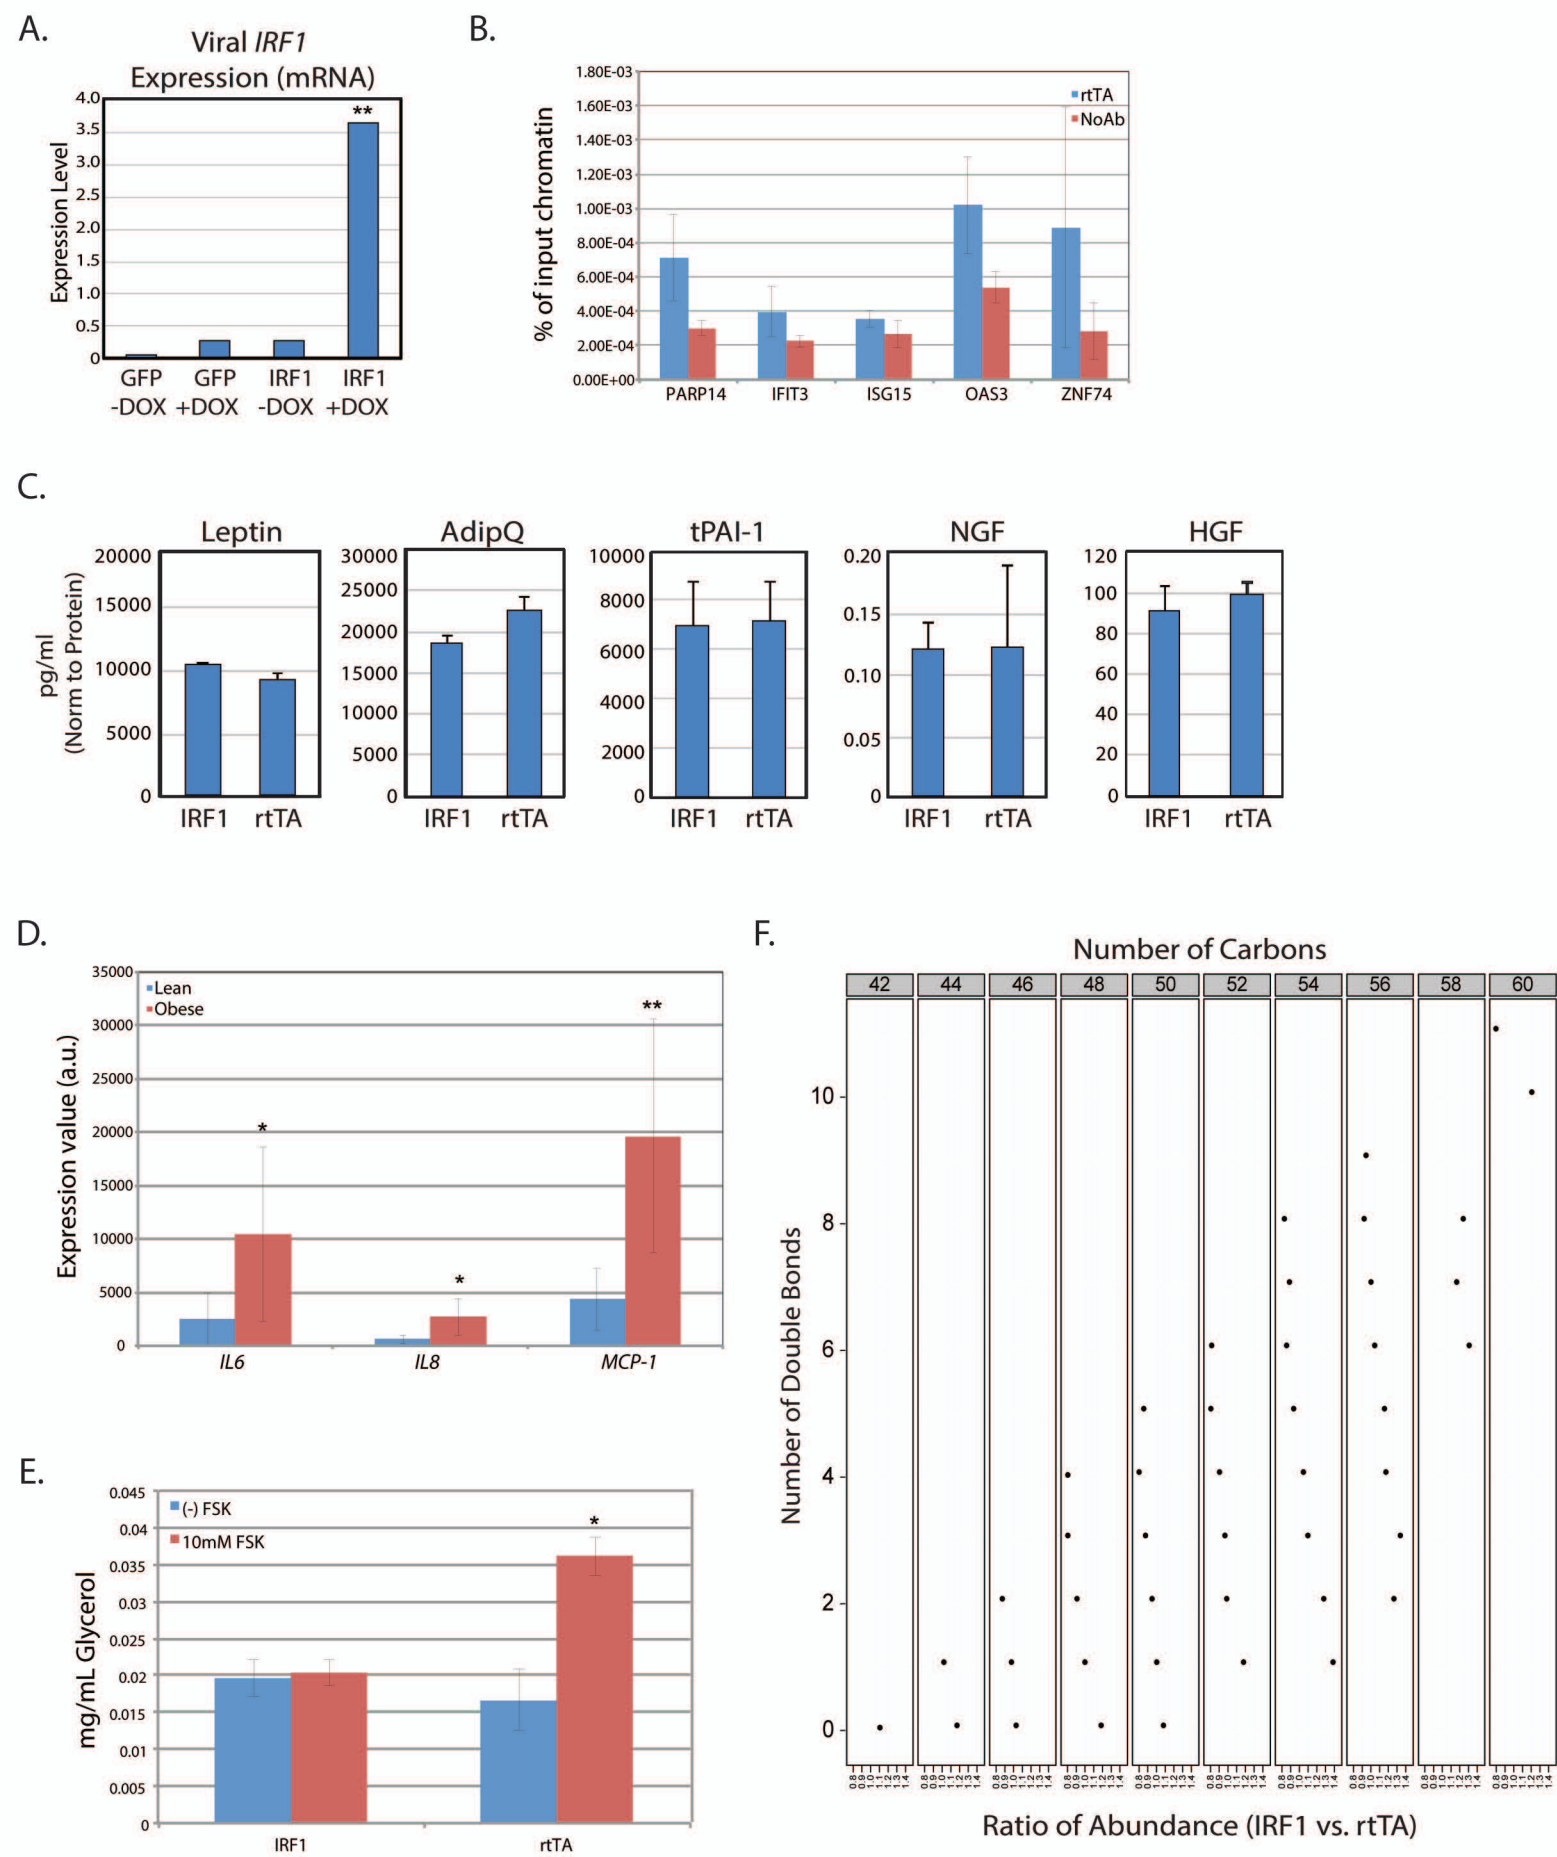

# Figure S3, *In vivo* IRF1 expression. Related to Figure 4.

A.

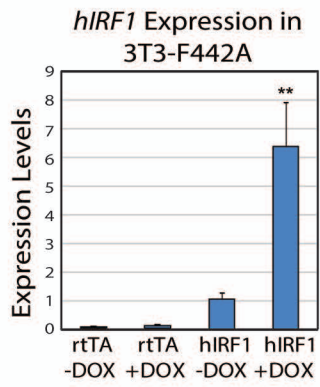

B.

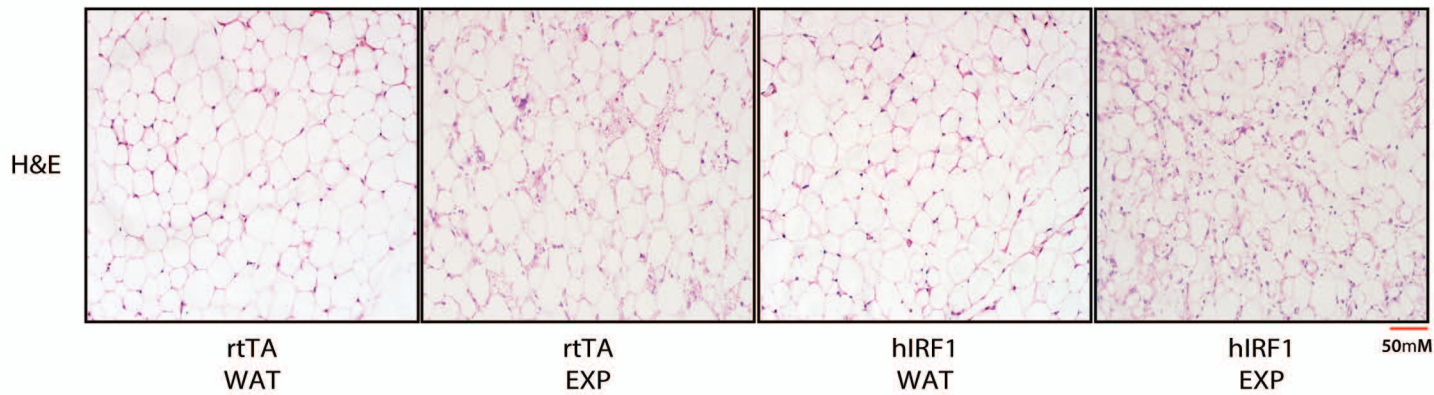

C.

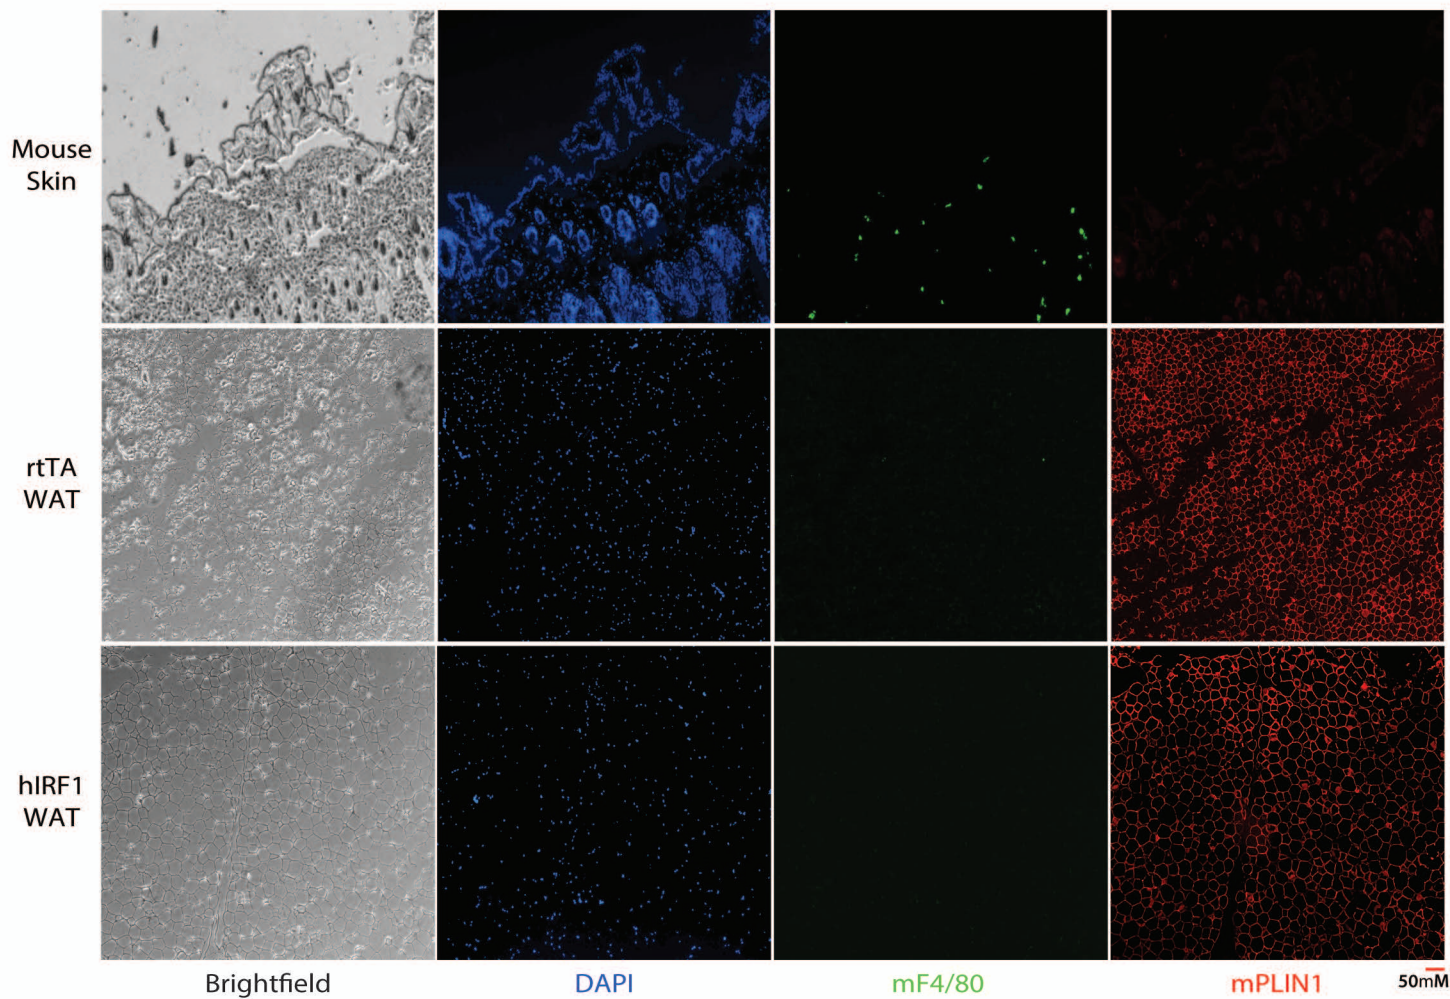

## Supplemental Figure Legends

**Figure S1.** A) ASC-adipocytes were co-stained with BoDIPY (green), DAPI (blue), and anti-C/EBP $\alpha$  (red) to assess differentiation efficiency. An Image J binary mask was used to count stained foci. B) RT-qPCR was used to quantify expression of adipogenic genes during a timecourse of ASC-adipocyte differentiation. "Day 0" represents undifferentiated ASCs. C) Venn diagram of genes higher expressed in primary adipocytes versus ASC-adipocytes overlapping with genes higher expressed in obese versus lean individuals.

**Figure S2.** Error bars represent +/- standard deviation of biological triplicates and statistically significant p-values are denoted by an asterisk (\* $\leq$ 0.05, \*\* $\leq$ 0.005). A) RT-qPCR was used to test expression of the inducible IRF1 transgene in ASC-adipocytes, in both the presence and absence of doxycycline (+/- DOX). ASC-adipocyte transfection with a DOX-inducible GFP transgene serves as a negative control. B) ChIP/qPCR was performed for IRF1 in rtTA control cells without IRF1 expression at putative binding sites (H3K4me1 bound IRF1 motif) (*PARP14*, *IFIT3*, *ISG15*). *OAS3* and *ZNF74* represent a negative control site where IRF1 is not predicted to bind. Signals are expressed as percentage of total chromatin input. C) A multiplex ELISA assay was utilized to measure adipokines and cytokines in secreted into culture media from adipocytes expressing IRF1. D) Expression of IL6, IL8 and MCP-1 in obese and lean individuals' adipocytes from the GEO dataset, related to figure 3A. E) Glycerol release into the media in response to forskolin (FSK) activated lipolysis was measured in IRF1- and rtTA-adipocytes. Two separate biological triplicates were averaged and plotted. Replication of and related to figure 3B. F) A plot of abundance ratio against number of double bonds for each total of carbon atoms for triglycerides in IRF-adipocytes vs. control (rtTA).

**Figure S3.** A) RT-qPCR was used to assay for doxycycline (DOX)-inducible expression of hIRF1 in 3T3-F442A cells. B) rtTA only or IRF1-expressing 3T3-F442A cells from were injected into 6-week old nude mice. 6 weeks post-injection, exogenous fat explants (EXP) and control autologous white adipose tissue (WAT) were harvested and stained with hemotoxylin and eosin (H&E). C) Autologous WAT and skin (positive control for macrophage localization) were harvested, probed with anti-F4/80 (green) to assess macrophage infiltration,  $\alpha$ -PLIN1 (red) to verify adipocyte identity, and stained with DAPI. Negligible numbers of macrophages are observed in control WAT.

# Supplemental experimental procedures

## Primer List

### Expression Analysis

|                               |                               |
|-------------------------------|-------------------------------|
| hMCP-1 exp For #1             | CAG CCA GAT GCA ATC AAT GCC   |
| hMCP-1 exp Rev #1             | TGG AAT CCT GAA CCC ACT TCT   |
| mf4/80 exp For #1             | TTG TAC GTG CAA CTC AGG ACT   |
| mf4/80 exp Rev #1             | GAT CCC AGA GTG TTG ATG CAA   |
| mMHCI F                       | GTGATCTCTGGCTGTGAAGT          |
| mMHCI R                       | GTCTCCACAAGCTCCATGTC          |
| mMHCII F                      | CAACCGTGACTATTCCTTCC          |
| mMHCII R                      | CCACAGTCTCTGTCAGCTC           |
| Viral IRF1 qPCR 1 For         | TCT GAA GAA CAT GGA TGC CAC C |
| pDL38R (LentiViral 3'UTR) Rev | AGCAGCGTATCCACATAG            |
| ADIPOQ For                    | GATGAAGTCCTGTCTTGGAAGG        |
| ADIPOQ Rev                    | CAGCACTTAGAGATGGAGTTGG        |
| FABP4 For                     | TCATGAAAGGCGTCACTTCC          |
| FABP4 Rev                     | GCTTGCTAAATCAGGGAAAACA        |
| PPARG2 For                    | GCAGGAGATCTACAAGGACTTG        |
| PPARG2 Rev                    | CCCTCAGAATAGTGCAACTGG         |
| Lep For                       | AAGGTTTGGTGTGTGGAGATG         |
| Lep Rev                       | CTCCTGTCTCTTCTTTCTCTGC        |
| PLIN1 For                     | CCCCCTGAAAAGATTGCTTCT         |
| PLIN1 Rev                     | GGAACGCTGATGCTGTTTCTG         |
| CIDEc For                     | AAGTCCCTTAGCCTTCTCTACC        |
| CIDEc Rev                     | CCTTCTCACGCTTCGATCC           |
| HPRT For                      | TGACACTGGCAAAACAATGCA         |
| HPRT Rev                      | GGTCCTTTTCACCAGCAAGCT         |

### ChIP-qPCR

|                       |                               |
|-----------------------|-------------------------------|
| IFIT3 Prom ChIP-1 For | CTG AGG CAG GAG AAT CAC TT    |
| IFIT3 Prom ChIP-1 Rev | TGA CTG TTG CTC TTT GAC CT    |
| PARP 14 ChIP-1 For    | GAT CTC TCT GCC TCC ACT CT    |
| PARP 14 ChIP-1 Rev    | GAT ATC AGG GGA TAG CCT TG    |
| ISG15 ChIP For        | CGC TTT GTG ACC AGA CCT CAC T |
| ISG15 ChIP Rev        | ATT TTG AAG GCA TGG CCG G     |
| IRS-1 ChIP For        | TTTCTCCACCCGCCGAGATG          |
| IRS-1 ChIP Rev        | CAGCGATTCCCGAGGCAAAT          |
